# Supplementary material for: Sensor-Derived Measures of Motor and Cognitive Functions in People With Multiple Sclerosis Using Unsupervised Smartphone-Based Assessments: Proof-of-Concept Study
Source: PubMed Central journal article supplement (PMC11584543; doi:10.2196/60673), 2024-11-08
Supplement: formative_v8i1e60673_app1.pdf [file formative_v8i1e60673_app1.pdf]

## Multimedia Appendix 1

### Table of Contents

|                                                                                                                |   |
|----------------------------------------------------------------------------------------------------------------|---|
| <b>Table S1.</b> Inclusion and exclusion criteria of the DigiToms study.....                                   | 2 |
| <b>Table S2.</b> Study participants' baseline characteristics.....                                             | 3 |
| <b>Table S3.</b> DMT treatment allocation.....                                                                 | 5 |
| <b>Figure S1.</b> Konectom™ app tests for cognitive and manual dexterity function. ....                        | 6 |
| <b>Figure S2.</b> Summary schedule of Konectom™ app tests for cognition, dexterity, and gait and posture. .... | 7 |
| <b>Figure S3.</b> EDSS distribution.....                                                                       | 8 |
| <b>Figure S4.</b> Process for selection and analysis of sensor-derived measures.....                           | 9 |

**Table S1.** Inclusion and exclusion criteria of the DigiToms study.

|                      | <b>Inclusion criteria</b>                                                                                                                                                                                                                                                                                                                               | <b>Exclusion criteria</b>                                                                                                                                                                                                                                                                                                                                                                                        |
|----------------------|---------------------------------------------------------------------------------------------------------------------------------------------------------------------------------------------------------------------------------------------------------------------------------------------------------------------------------------------------------|------------------------------------------------------------------------------------------------------------------------------------------------------------------------------------------------------------------------------------------------------------------------------------------------------------------------------------------------------------------------------------------------------------------|
| People with MS       | <ul style="list-style-type: none"> <li>• Aged 18-64 years</li> <li>• Diagnosis of MS according to 2017 revised McDonald criteria</li> <li>• EDSS score <math>\leq 6.0</math></li> </ul>                                                                                                                                                                 | <ul style="list-style-type: none"> <li>• Severe ongoing psychiatric condition, including depression</li> <li>• Change of DMT or psychotropic treatment in the last month</li> <li>• Clinically significant addiction</li> <li>• Recent acute relapse or disability worsening (&lt;1 month)</li> <li>• Steroid course in the previous month</li> <li>• Neuropsychological testing in the previous year</li> </ul> |
| Healthy participants | <ul style="list-style-type: none"> <li>• Recruited from a center-owned database</li> <li>• Participants were considered healthy if they were not suffering from injuries that could affect walking and turning, or fine motor function</li> <li>• Aged 18-64</li> <li>• Matched to MS patient sample for age, gender, and level of education</li> </ul> | <ul style="list-style-type: none"> <li>• Severe ongoing psychiatric condition, including depression</li> <li>• Any clinically significant neurological disorder</li> <li>• Any psychotropic therapy consumption</li> <li>• Clinically significant addiction</li> <li>• Previous participation in other cognitive study using the same tests</li> <li>• Developmental learning disabilities</li> </ul>            |

*DMT* disease-modifying therapy. *EDSS* Expanded Disability Status Scale. *MS* multiple sclerosis.

Table S2. Study participants' baseline characteristics.

| Characteristic                                                | People with MS<br>(n=85) | Healthy Participants<br>(n=68) | P value             |
|---------------------------------------------------------------|--------------------------|--------------------------------|---------------------|
| <b>Age</b> (year), median (min, max)                          | 44.0 (20.0, 62.0)        | 40.5 (20.0, 62.0)              | .3018 <sup>a</sup>  |
| <b>Gender</b> , n (%)                                         |                          |                                |                     |
| Female                                                        | 70 (82.4)                | 57 (83.8)                      | .8098 <sup>b</sup>  |
| Male                                                          | 15 (17.6)                | 11 (16.2)                      |                     |
| <b>Body mass index (kg/m<sup>2</sup>)</b> , median (min, max) | 23.7 (16.6, 44.6)        | 23.5 (16.8, 36.5)              | .9269 <sup>a</sup>  |
| <b>MS type</b> , N (%)                                        |                          |                                |                     |
| PPMS/PRMS/SPMS                                                | 4 (4.7)                  | NA                             | NA                  |
| RRMS                                                          | 81 (95.3)                | NA                             | NA                  |
| <b>Disease duration</b> (year), median (min, max)             | 8 (0,37)                 | NA                             | NA                  |
| <b>Number of relapses last 12 months, median (min, max)</b>   | 0.0 (0.0, 5.0)           | NA                             | NA                  |
| <b>Education Level</b> , <sup>f</sup> N (%)                   |                          |                                |                     |
| ISCED <3                                                      | 14 (16.5)                | 9 (13.2)                       | .9374 <sup>b</sup>  |
| ISCED 3                                                       | 16 (18.8)                | 12 (17.6)                      |                     |
| ISCED 4-6                                                     | 38 (44.7)                | 32 (47.1)                      |                     |
| ISCED >6                                                      | 17 (20.0)                | 15 (22.1)                      |                     |
| <b>Job status</b> , N (%)                                     |                          |                                |                     |
| Unemployed                                                    | 18 (21.2)                | 6 (8.8)                        | .0057 <sup>b</sup>  |
| Part-time job                                                 | 22 (25.9)                | 9 (13.2)                       |                     |
| Full-time job                                                 | 45 (52.9)                | 53 (77.9)                      |                     |
| <b>Dominant hand</b> , N (%)                                  |                          |                                |                     |
| Left                                                          | 9 (10.6)                 | 5 (7.4)                        | .4904 <sup>b</sup>  |
| Right                                                         | 76 (89.4)                | 63 (92.6)                      |                     |
| Ambidextrous                                                  | 0 (0.0)                  | 0 (0.0)                        |                     |
| <b>EDSS</b> , median (min, max)                               | 2.0 (0.0, 4.5)           | NA                             | NA                  |
| <b>9HPT</b> dominant hand (seconds), <sup>d</sup> mean (SD)   | 21.4 (6.7)               | 18.0 (2.0)                     | <.0001 <sup>a</sup> |

|                                                                           |               |               |                     |
|---------------------------------------------------------------------------|---------------|---------------|---------------------|
| <b>9HPT</b> nondominant Hand (seconds), <sup>d</sup> mean (SD)            | 22.2 (4.4)    | 18.6 (2.0)    | <.0001 <sup>a</sup> |
| <b>T25FW</b> (seconds), <sup>e</sup> mean (SD)                            | 4.5 (0.8)     | 4.0 (0.5)     | <.0001 <sup>a</sup> |
| Daily Walk test (meters), mean (SD)                                       | 495.0 (102.3) | 556.1(77.7)   | .0002 <sup>a</sup>  |
| <b>SDMT</b> (number of correct responses), <sup>c</sup> median (min, max) | 58 (29, 85)   | 65 (41, 85)   | .0002 <sup>a</sup>  |
| <b>BVMT</b> <sup>c</sup> , median (Q1, Q3)                                | 31 (6, 36)    | 32 (10, 36)   | .1155 <sup>a</sup>  |
| <b>FVLT</b> <sup>c</sup> , median (Q1, Q3)                                | 68 (34, 77)   | 67.5 (38, 77) | .6445 <sup>a</sup>  |

<sup>a</sup>Wilcoxon test.

<sup>b</sup>Chi-square test.

<sup>c</sup>Performed either at V1 or V2, depending on randomization.

<sup>d</sup>Average time to complete the test from both attempts.

<sup>e</sup>Average time to complete the test from both attempts (seconds).

<sup>f</sup>ISCED <3: No baccaulaureate = did not complete upper secondary education, ISCED 3: Baccaulaureate = completed upper secondary education, ISCED 4-6: Secondary education short (≥ Baccaulaureate +2) = post-secondary tertiary education < master level, ISCED >6: Secondary education long (≥ Baccaulaureate +5) = master level and above.

*BVMT* Brief Visuospatial Memory Test. *EDSS* Expanded Disability Status Scale. *FVLT* French Verbal Learning Test. *ISCED* International Standard Classification of Education. *MS* multiple sclerosis. *PPMS* primary progressive multiple sclerosis. *PRMS* progressive relapsing multiple sclerosis. *RRMS* relapsing-remitting multiple sclerosis. *SPMS* secondary-progressive multiple sclerosis. *SDMT* Symbol Digit Modalities Test.

**Table S3.** DMT treatment allocation.

| <b>DMT</b>              | <b>Number of patients</b> |
|-------------------------|---------------------------|
| Natalizumab             | 58                        |
| Ocrelizumab             | 15                        |
| Other DMTs <sup>a</sup> | 12                        |

Excludes patients who were lost to follow-up (three people with MS).

<sup>a</sup>Included teriflunomide, dimethyl fumarate, fingolimod, glatiramer acetate, azathioprine, methotrexate, cyclophosphamide.

*DMT* disease-modifying therapy.

Figure S1. Konectom™ app tests for cognitive and manual dexterity function.

**A**

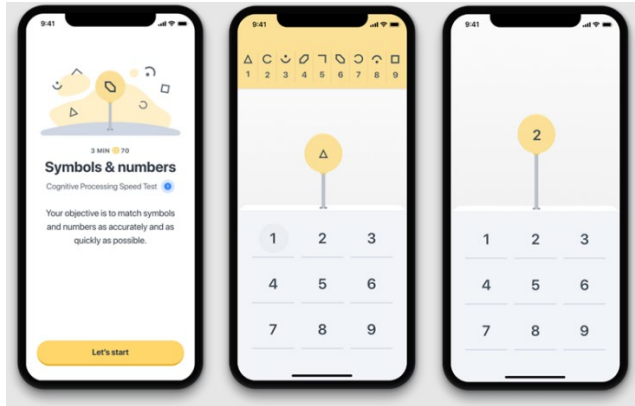

**B**

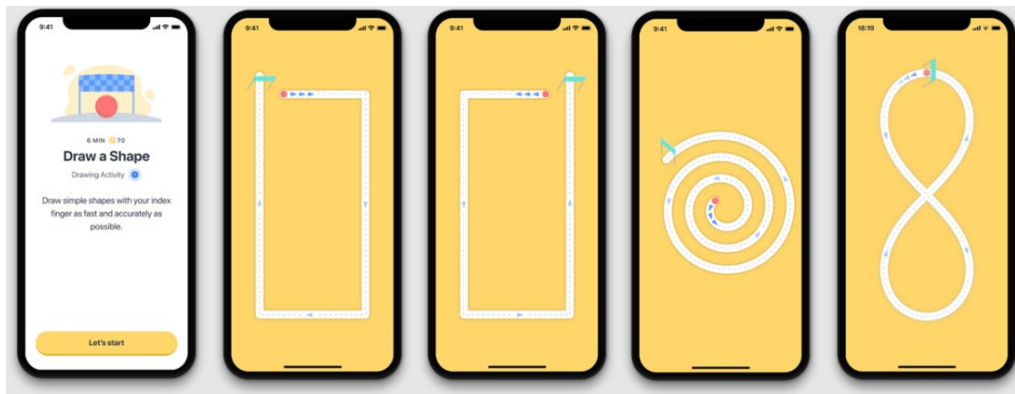

**C**

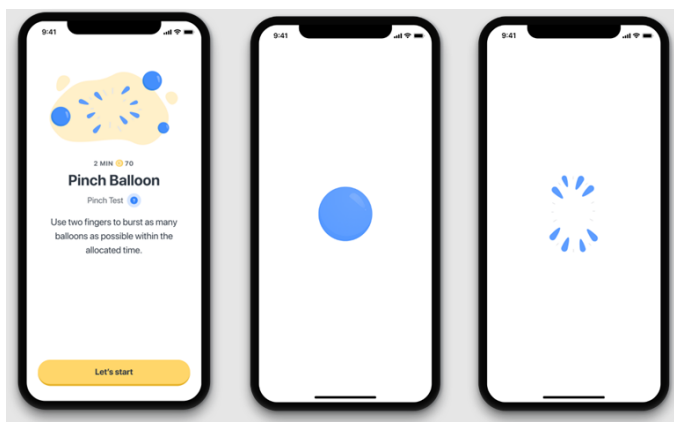

Konectom™ app interface: **(A)** Cognitive Processing Speed test; **(B)** Drawing test; **(C)** Pinching test.

**Figure S2.** Summary schedule of Konectom™ app tests for cognition, dexterity, and gait and posture.

| <i>Test Type</i>    | <i>Test name</i>                                                                    |                                                             |
|---------------------|-------------------------------------------------------------------------------------|-------------------------------------------------------------|
| Experience Sampling |    | <b>Mood scale</b>                                           |
|                     |    | <b>MSIS-29</b><br>Multiple Sclerosis Impact Scale           |
| Cognition           |    | <b>Symbols &amp; Numbers</b><br>Cognitive Processing Speed  |
| Fine Motor          |    | <b>Pinch Balloons</b><br>Pinching Test                      |
|                     |    | <b>Draw a Shape</b><br>Drawing Test                         |
| Gait & Posture      |  | <b>Balance &amp; U-turn</b><br>Static Balance & U-Turn Test |
|                     |  | <b>Daily Walk</b><br>6 Minute Walk Test                     |

**Figure S3.** EDSS distribution.

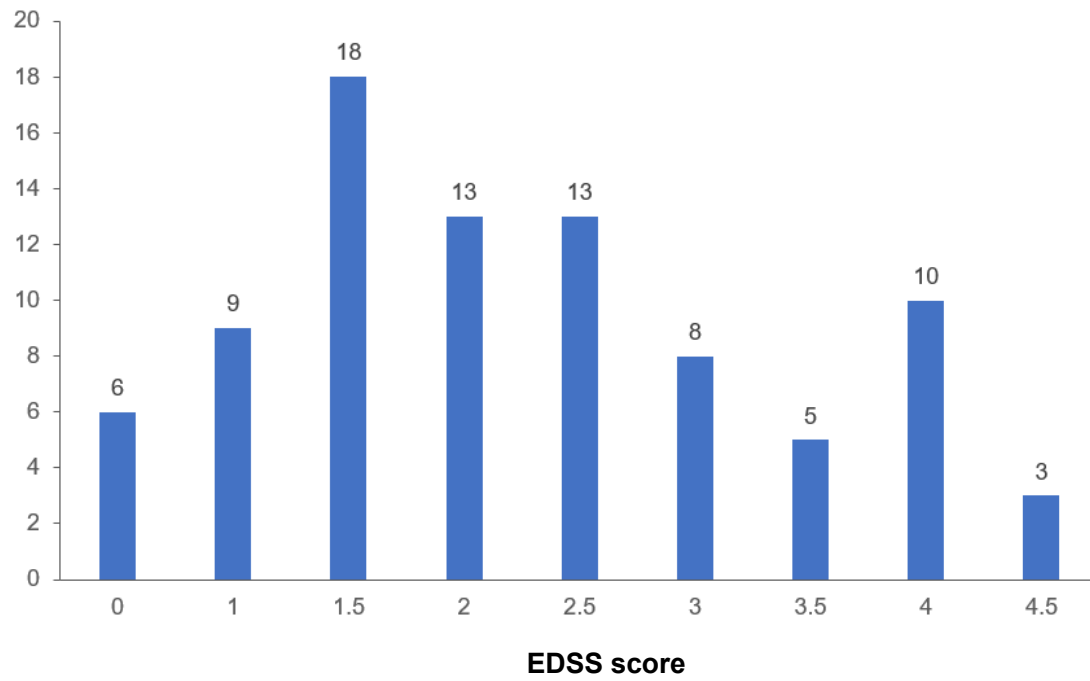

*EDSS* Expanded Disability Status Scale.



**Figure S4.** Process for selection and analysis of sensor-derived measures.

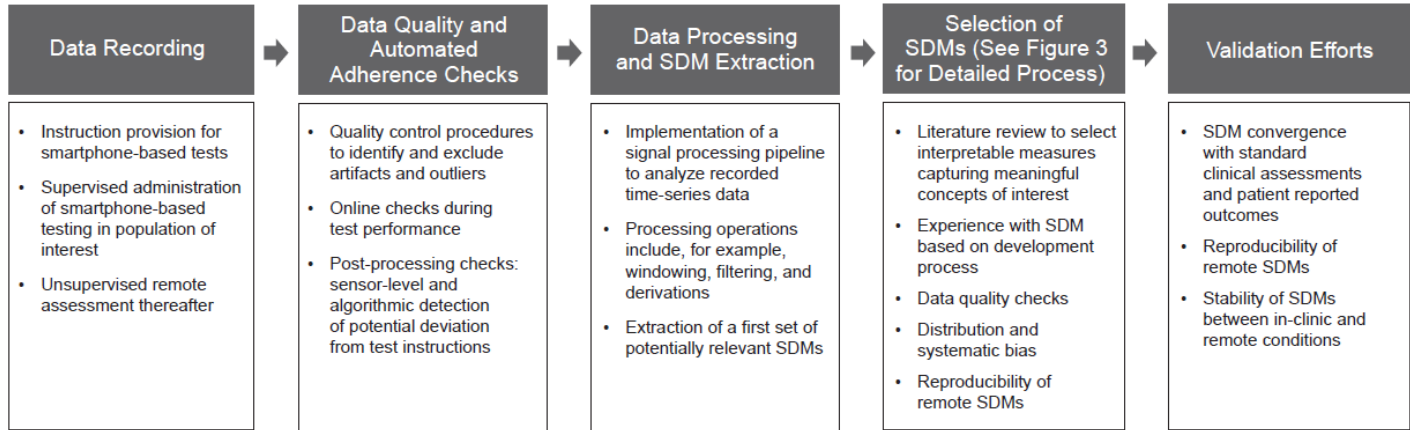

*SDM* sensor-derived measures.
